# Supplementary material
Source: Springer Nature journal article supplement (https://www.springermedizin.de/resource/supplementary/12889_2010_2889_MOESM4_ESM.pdf/9487566)
Supplement: MOESM4 [file 9487566]

# Exposure to Second Hand Smoke in Public Places & Ability to Smoke at Work

## Rate Differences: 2003–2005

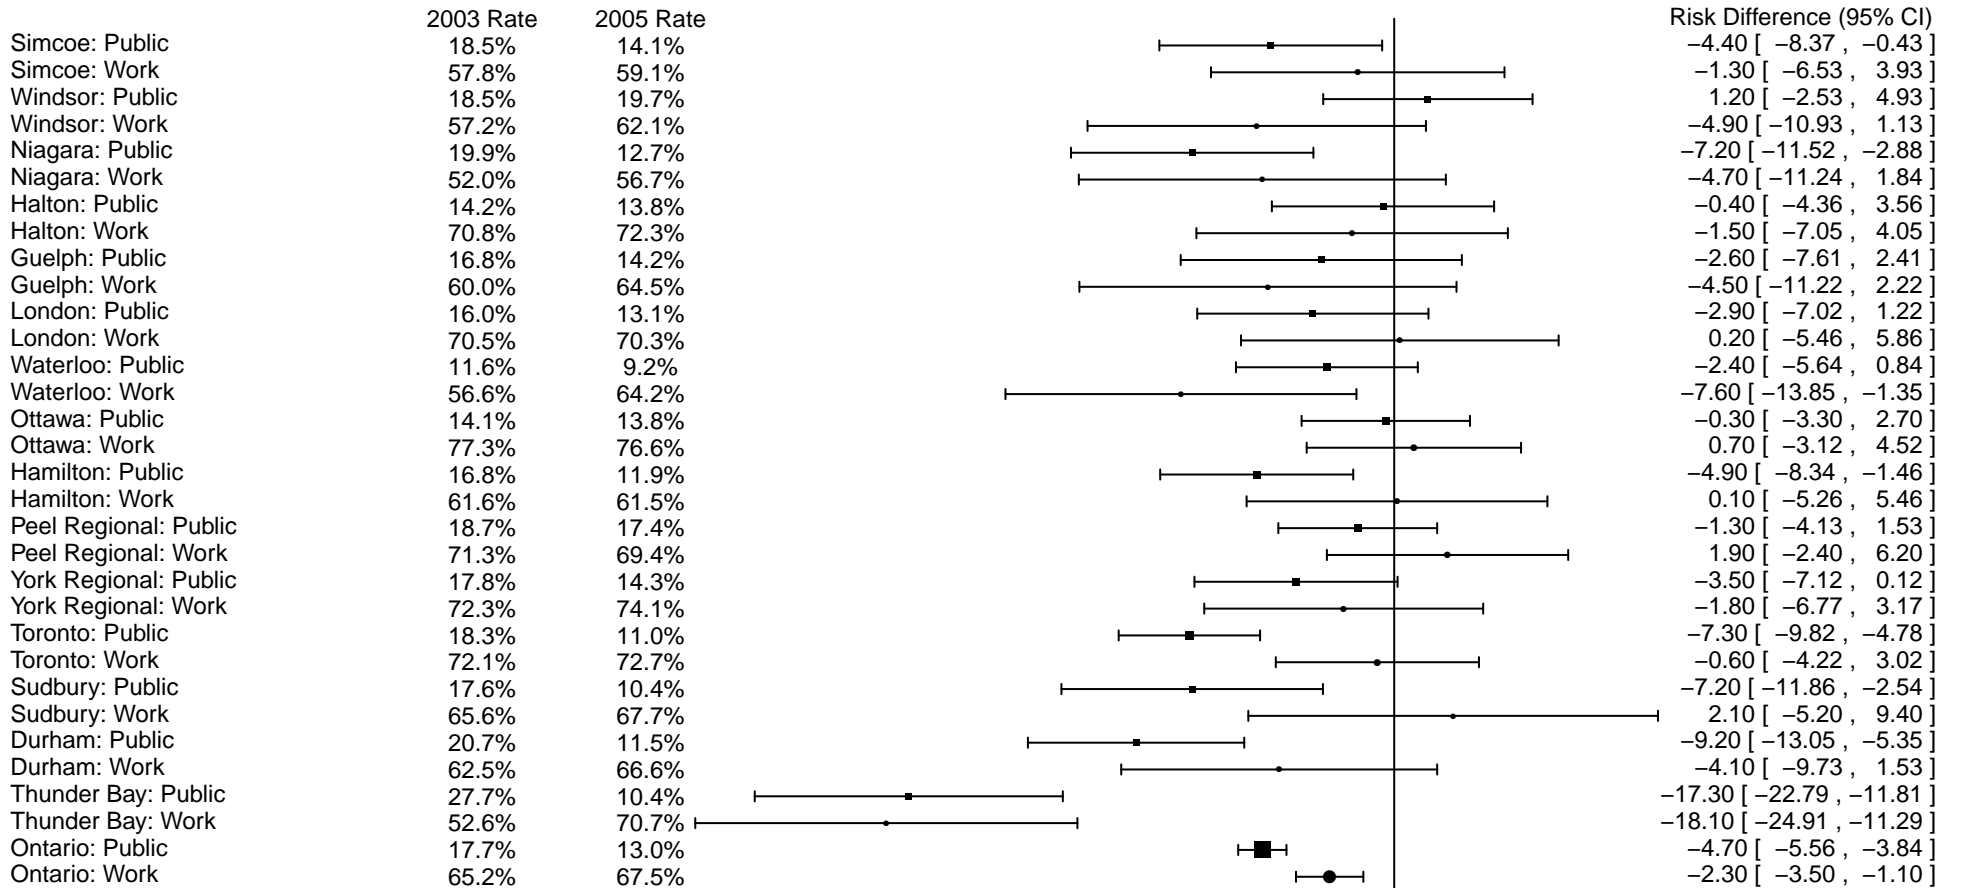

Risk Difference: 2005 minus 2003
